duration of dog Purkinje fibers<sup>3</sup> as well as of human atrial tissue.<sup>1</sup> The underlying mechanism is a block by tetrodotoxin of the steady state  $\text{Na}^+$  current.<sup>4</sup> Because in the present experiments the fibers were partially depolarized and therefore the residual available fast  $\text{Na}^+$  channels were fewer, halothane may have decreased the fast  $\text{Na}^+$  current, as suggested by the decrease in  $\dot{V}_{\text{max}}$  and  $a_{\text{Na}}$ . The reduction of  $\dot{V}_{\text{max}}$  and of the upstroke amplitude was greater in the fiber depolarized in 8 mM  $[\text{K}]_0$  than in the fiber perfused in normal  $[\text{K}]_0$  (fig. 1). Since  $\text{Ca}^{2+}$  current may contribute to the upstroke, especially in the presence of  $\beta$ -adrenergic agonists, the depression of  $\text{Ca}^{2+}$  current by halothane might contribute to the observed effect. Still, the present demonstration that halothane decreases  $a_{\text{Na}}$  in partially depolarized fibers suggests that halothane might decrease the fast  $\text{Na}^+$  current more when the cells are depolarized (and therefore with fewer available  $\text{Na}^+$  channels<sup>5</sup>). A diminished fast  $\text{Na}^+$  current might contribute to electrical uncoupling in cardiac cells treated with halothane.<sup>6</sup> Thus, the present findings may be significant in relation to the arrhythmogenic actions of halothane in patients with ischemic heart disease.

An alternative explanation is that halothane decreases  $a_{\text{Na}}$  by reducing  $\text{Ca}^{2+}$  influx and  $a_{\text{Ca}}$ ; the consequent increase in the transmembrane  $\text{Ca}^{2+}$  electrochemical gradient in turn would decrease  $a_{\text{Na}}$  through the  $\text{Na}^+$ - $\text{Ca}^{2+}$  exchange. The determination of the mechanism of  $a_{\text{Na}}$  decrease requires further experimentation. However, the present results indicate that a decrease in  $a_{\text{Na}}$  in human cardiac tissues is to be added to the effects of halothane and should contribute to the decrease in contractile force.

YUAN-HWA CHOU, M.D., M.S.  
*Research Fellow*

JENG WEI, M.D., M.S.D.  
*Associate Professor and Chairman*  
*Department of Surgery*

CHENG-I LIN, B.D.S., PH.D.  
*Professor of Pharmacology*

*National Defense Medical Center, Taipei*  
*Taiwan, Republic of China*

## REFERENCES

1. Luk HN, Lin CI, Wei J, Chang CL: Depressant effects of isoflurane and halothane on isolated human atrial fibers. *ANESTHESIOLOGY* 69:667-676, 1988
2. Ikemoto Y, Yatani A, Imoto Y, Arimura H: Reduction in the myocardial sodium current by halothane and thiamylal. *Jpn J Physiol* 36:107-121, 1980
3. Coraboeuf E, Deroubaix E, Coulombe A: Effect of tetrodotoxin on action potentials of the conducting system in the dog heart. *Am J Physiol* 236:H561-567, 1979
4. Attwell D, Cohen I, Eisner D, Ohba M, Ojeda C: The steady state TTX-sensitive ("window") sodium current in cardiac Purkinje fibres. *Pfluegers Arch* 379:137-142, 1979
5. Hisatome I, Kiyosue T, Imanishi S, Arita M: Isoproterenol inhibits residual fast channel via stimulation of beta-adrenoreceptors in guinea-pig ventricular muscle. *J Mol Cell Cardiol* 17:657-665, 1985
6. Terrar DA, Victory JGG: Influence of halothane on electrical coupling in cell pairs isolated from guinea-pig ventricle. *Br J Pharmacol* 94:509-514, 1988

(Accepted for publication July 26, 1991.)

Anesthesiology  
75:717-718, 1991

## Failed Spinal Anesthesia with the Sprotte Needle

*To the Editor:*—Recent reports<sup>1,2</sup> have compared Quincke point spinal needles to the 24-G Sprotte (pencil-point) needle with respect to the incidence of post-dural puncture headache in various patient subgroups. These reports and a review of the literature comparing various spinal needles have not mentioned failure of the technique as a complication of needle design.

Since the introduction of the Sprotte needle to our hospital, a perceived increase in the failure rate of spinal anesthetics using the Sprotte needle was suggested by anesthesia staff and residents. We therefore undertook a retrospective analysis of the anesthetic charts from September, 1990 to March, 1991 to address this specific issue. This period was chosen to eliminate the "learning period" of new residents in the program and, it was hoped, to account for lack of experience with regional anesthesia techniques. A "failed technique" was defined as the lack of acceptable anesthesia for the proposed surgical procedure, following the injection of local anesthetic after free-flow cerebrospinal fluid (CSF) was identified with any spinal needle.

The failure rate of spinal anesthesia using the Sprotte needle (22- and 24-G) was compared to the failure rate with all other spinal needles (22-, 25-, and 27-G Quincke point needles) used during the same time period. Of 394 spinal anesthetics performed at our institution there were 20 (5.1%) failures. Charts with incomplete data totaled 49 of 394

(12%) and were excluded from analysis. Sprotte needles were used in 87 cases, with 9 (10.3%) failures, as compared to 11 of 258 (4.3%) with all other needle types. Within the failure group of 20 there were 4 unknown needles used that were included in the non-Sprotte group. There was a significant difference ( $P = 0.02$ ) (chi-squared analysis) between the groups. The type of local anesthetic used included lidocaine (6), bupivacaine (2), and tetracaine (1) in the Sprotte group and lidocaine (3), bupivacaine (4), tetracaine (1), and 3 unreported local anesthetics in the non-Sprotte group. Free-flow CSF was documented on 16 of 20 anesthetic records. Although difficult to evaluate, the experience of the anesthetists in the two groups was considered similar.

Possible explanations for this difference may include inexperience with the new needle type, experience of the operator, or the local anesthetic used. A more plausible reason could relate to the design of the needle, specifically the dimensions and placement of the sideport, allowing for free flow of CSF and deposition of local anesthetic solution into both the CSF and the epidural space, resulting in an inadequate spinal block. The length from the needle tip to the opening of the sideport is 1.2 mm (22- and 24-G). The length of the sideport opening is 1.75 mm on the 24-G and 2.0 mm on the 22-G Sprotte needle. From cadaveric studies<sup>3</sup> and our own unpublished observations of fresh cadaveric dural specimens, dural thickness can vary from 0.5 to almost

2.0 mm, with the thickest area at the cervical region and the thinnest in the thoracic region. The average thickness in the lumbar area is 1.0 mm. These dimensions would certainly support our suggestion that free CSF could be identified with part of the side opening still occupying the epidural space.

One of the advantages of the Sprotte needle used in the obstetric population is the documented decrease in the incidence of post-dural puncture headache.<sup>1</sup> However, the risk of a possible failed technique (particularly if the spinal is administered for an urgent or emergent cesarean section) may outweigh its benefit. Advancing the needle an additional 2 or 3 mm has been suggested as a solution to this problem but may increase the incidence of paresthesia. The distinct endpoint of CSF identification with the Sprotte needle now introduces an aspect of unpredictability.

Further controlled prospective studies are warranted to test this hypothesis and to assess possible neurologic sequelae if one chooses to use an "advancement" technique to eliminate the possibility of incomplete blocks. If these future studies support our hypothesis, we suggest that the manufacturers alter the needle design by changing the dimensions of the sideport opening to eliminate this potential complication.

LESLEY-ANN L. CRONE, M.D., F.R.C.P.(C.)  
*Associate Professor*

WENDY VOGEL, M.D.  
*Resident 1*

*Department of Anaesthesia  
Royal University Hospital  
Saskatoon, Saskatchewan  
S7N 0X0*

#### REFERENCES

1. Cesarini M, Torrielli R, Lahaye F, Mene JM, Cabiro C: Sprott needle for intrathecal anaesthesia for Caesarean section: Incidence of postdural puncture headache. *Anaesthesia* 45:656-658, 1990
2. Flanagan JF, Kummatta D, Black D: Comparison of 24 gauge Sprotte and 27 gauge Quincke needle on the incidence of post dural puncture headache (abstract). *Anesth Analg* 72:S75, 1991
3. Dittman M, Schafer HG, Ulrich J, Bond-Taylor W: Anatomical reevaluation of lumbar dura mater with regard to postspinal headache: Effect of dural puncture. *Anaesthesia* 43:635-637, 1988

*(Accepted for publication July 26, 1991.)*
